# Supplementary material for: Mouse models of human ocular disease for translational research
Source: PubMed Central journal article supplement (PMC5578669; doi:10.1371/journal.pone.0183837), 2017-08-31

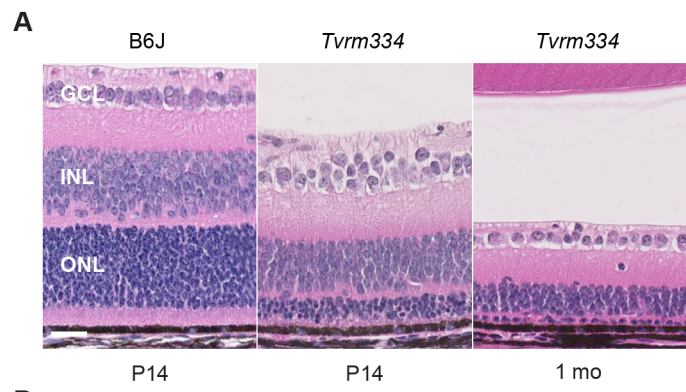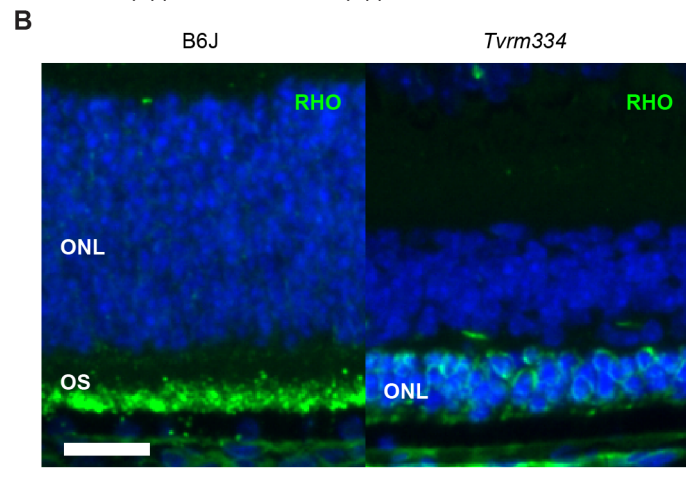

Supplement: pone.0183837.s004.pdf [file pone.0183837.s004.pdf]
